# Supplementary material for: BRCA1 and BRCA2 Missense Variants of High and Low Clinical Significance Influence Lymphoblastoid Cell Line Post-Irradiation Gene Expression
Source: PLoS Genet. 2008 May 23;4(5):e1000080. doi: 10.1371/journal.pgen.1000080 (PMC2375115; doi:10.1371/journal.pgen.1000080)
Supplement: Table S4 — The top 200 significant genes from the comparison of BRCA2 Missense vs BRCAX without an LCS. (0.06 MB XLS) [file pgen.1000080.s005.xls]

## Sheet: TOP200
The top 200 significant genes from the comparison of BRCA2 Missense vs BRCAX without an LCS
Gene Name	P-value	Common	Genbank	Description
GI_20070295-S	7.94e-05	RNPEPL1	NM_018226.2	Homo sapiens arginyl aminopeptidase (aminopeptidase B)-like 1 (RNPEPL1), mRNA.
GI_13376090-S	7.71e-05	MMRN2	NM_024756.1	Homo sapiens multimerin 2 (MMRN2), mRNA.
GI_22748652-S	7.64e-05	ARRDC1	NM_152285.1	Homo sapiens arrestin domain containing 1 (ARRDC1), mRNA.
GI_31542761-S	7.6e-05	FLJ32452	NM_144576.2	Homo sapiens hypothetical protein FLJ32452 (FLJ32452), mRNA.
GI_42660048-S	7.54e-05	LOC400083	XM_375005.1	Homo sapiens similar to Dynein heavy chain at 89D CG1842-PA (LOC400083), mRNA.
GI_40805835-S	7.39e-05	CYP2D6	NM_000106.3	Homo sapiens cytochrome P450, family 2, subfamily D, polypeptide 6 (CYP2D6), mRNA.
hmm23226-S	7.2e-05	hmm23226	null	Gnomon gene hmm23226 , RefSeq build 34
GI_21362011-S	7.19e-05	FLJ22625	NM_024715.2	Homo sapiens hypothetical protein FLJ22625 (FLJ22625), mRNA.
GI_21735418-S	7.19e-05	BDG29	NM_015144.1	Homo sapiens BDG-29 proten (BDG29), mRNA.
GI_19743876-S	7.13e-05	RFX1	NM_002918.2	Homo sapiens regulatory factor X, 1 (influences HLA class II expression) (RFX1), mRNA.
GI_29788788-S	6.81e-05	DCOHM	NM_032151.2	Homo sapiens dimerization cofactor of hepatocyte nuclear factor 1 ( HNF1) from muscle (DCOHM), mRNA.
GI_4506418-S	6.46e-05	RARA	NM_000964.1	Homo sapiens retinoic acid receptor, alpha (RARA), mRNA.
GI_42661092-S	6.42e-05	LOC146850	XM_375404.1	Homo sapiens hypothetical protein LOC146850 (LOC146850), mRNA.
GI_28559008-I	6.4e-05	SSX3	NM_175711.1	Homo sapiens synovial sarcoma, X breakpoint 3 (SSX3), transcript variant 2, mRNA.
GI_31542508-S	6.35e-05	ADP-GK	NM_031284.3	Homo sapiens ATP-dependent glucokinase (ADP-GK), mRNA.
GI_5360211-I	6.11e-05	GAS7	NM_005890.1	Homo sapiens growth arrest-specific 7 (GAS7), transcript variant b, mRNA.
GI_21687263-S	6.08e-05	ZNF558	NM_144693.1	Homo sapiens zinc finger protein 558 (ZNF558), mRNA.
GI_13129135-S	6.06e-05	MGC5306	NM_024116.1	Homo sapiens hypothetical protein MGC5306 (MGC5306), mRNA.
GI_18596717-S	6.01e-05	LOC159053	XM_099021.1	Homo sapiens LOC159053 (LOC159053), mRNA.
GI_4557354-I	5.99e-05	BCL2	NM_000633.1	Homo sapiens B-cell CLL/lymphoma 2 (BCL2), nuclear gene encoding mitochondrial protein, transcript variant alpha, mRNA.
GI_34915997-S	5.96e-05	FLJ20209	NM_194276.1	Homo sapiens hypothetical protein FLJ20209 (FLJ20209), mRNA.
GI_31542979-S	5.86e-05	IFIT4	NM_001549.2	Homo sapiens interferon-induced protein with tetratricopeptide repeats 4 (IFIT4), mRNA.
GI_42656961-S	5.73e-05	KIAA1109	XM_371706.2	Homo sapiens hypothetical protein KIAA1109 (KIAA1109), mRNA.
GI_34485729-S	5.64e-05	PRKY	NM_002760.2	Homo sapiens protein kinase, Y-linked (PRKY), mRNA.
GI_8922670-S	5.64e-05	C2orf6	NM_018221.1	Homo sapiens chromosome 2 open reading frame 6 (C2orf6), mRNA.
GI_40538787-S	5.59e-05	NLGN4Y	NM_014893.2	Homo sapiens neuroligin 4, Y linked (NLGN4Y), mRNA.
Hs.203697-S	5.45e-05	Hs.203697	null	Cluster 203697 , UniGene build 163
GI_32313604-A	5.44e-05	SPINT1	NM_003710.2	Homo sapiens serine protease inhibitor, Kunitz type 1 (SPINT1), transcript variant 2, mRNA.
GI_25453476-S	5.39e-05	EEF2	NM_001961.2	Homo sapiens eukaryotic translation elongation factor 2 (EEF2), mRNA.
GI_37546538-S	5.36e-05	LOC375836	XM_351938.1	Homo sapiens similar to Protein kinase PKX1 (LOC375836), mRNA.
GI_5453709-S	5.34e-05	LASP1	NM_006148.1	Homo sapiens LIM and SH3 protein 1 (LASP1), mRNA.
GI_8923683-S	5.31e-05	FLJ20808	NM_017960.1	Homo sapiens hypothetical protein FLJ20808 (FLJ20808), mRNA.
GI_6042203-I	5.09e-05	MME	NM_007289.1	Homo sapiens membrane metallo-endopeptidase (neutral endopeptidase, enkephalinase, CALLA, CD10) (MME), transcript variant 2b, mRNA.
GI_32307149-A	5.09e-05	OGT	NM_181673.1	Homo sapiens O-linked N-acetylglucosamine (GlcNAc) transferase (UDP-N-acetylglucosamine:polypeptide-N-acetylglucosaminyl transferase) (OGT), transcript variant 2, mRNA.
GI_37539764-S	4.93e-05	LOC375256	XM_351479.1	Homo sapiens similar to Sodium/hydrogen exchanger 4 (Na(+)/H(+) exchanger 4) (NHE-4) (LOC375256), mRNA.
Hs.463050-S	4.85e-05	Hs.463050	null	Cluster 463050 , UniGene build 163
GI_14550404-S	4.84e-05	RAD18	NM_020165.2	Homo sapiens RAD18 homolog (S. cerevisiae) (RAD18), mRNA.
GI_21040319-A	4.84e-05	SON	NM_138925.1	Homo sapiens SON DNA binding protein (SON), transcript variant a, mRNA.
GI_21071053-A	4.72e-05	SMARCA3	NM_139048.1	Homo sapiens SWI/SNF related, matrix associated, actin dependent regulator of chromatin, subfamily a, member 3 (SMARCA3), transcript variant 2, mRNA.
GI_32490588-A	4.51e-05	PRX	NM_181882.1	Homo sapiens periaxin (PRX), mRNA.
GI_22027626-A	4.43e-05	TRAF5	NM_145759.1	Homo sapiens TNF receptor-associated factor 5 (TRAF5), transcript variant 2, mRNA.
GI_27734960-S	4.39e-05	MGC34805	NM_173525.1	Homo sapiens hypothetical protein MGC34805 (MGC34805), mRNA.
GI_6005787-S	4.37e-05	NISCH	NM_007184.1	Homo sapiens nischarin (NISCH), mRNA.
GI_33519435-A	4.34e-05	CCNB1IP1	NM_182849.1	Homo sapiens cyclin B1 interacting protein 1 (CCNB1IP1), transcript variant 2, mRNA.
Hs.486726-S	4.17e-05	Hs.486726	null	Cluster 486726 , UniGene build 163
GI_19923649-S	4.08e-05	ZNF607	NM_032689.2	Homo sapiens zinc finger protein 607 (ZNF607), mRNA.
GI_33620754-S	3.99e-05	FLJ10201	NM_018023.3	Homo sapiens hypothetical protein FLJ10201 (FLJ10201), mRNA.
GI_24429565-I	3.83e-05	PDE7A	NM_002603.1	Homo sapiens phosphodiesterase 7A (PDE7A), transcript variant 1, mRNA.
GI_34878696-A	3.8e-05	LKAP	NM_019081.2	Homo sapiens limkain b1 (LKAP), transcript variant 2, mRNA.
GI_13899280-S	3.68e-05	MGC13033	NM_031447.1	Homo sapiens hypothetical protein MGC13033 (MGC13033), mRNA.
GI_45331216-S	3.64e-05	ZNF526	NM_133444.1	Homo sapiens zinc finger protein 526 (ZNF526), mRNA.
GI_38149839-A	3.61e-05	SEC31L2	NM_015490.3	Homo sapiens SEC31-like 2 (S. cerevisiae) (SEC31L2), transcript variant 1, mRNA.
GI_5454057-S	3.55e-05	SIAT4C	NM_006278.1	Homo sapiens sialyltransferase 4C (beta-galactoside alpha-2,3-sialyltransferase) (SIAT4C), mRNA.
GI_21389334-S	3.51e-05	C14orf9	NM_144568.1	Homo sapiens chromosome 14 open reading frame 9 (C14orf9), mRNA.
GI_32307111-S	3.5e-05	PPP2R2A	NM_002717.2	Homo sapiens protein phosphatase 2 (formerly 2A), regulatory subunit B (PR 52), alpha isoform (PPP2R2A), mRNA.
Hs.503257-S	3.37e-05	Hs.503257	null	Cluster 503257 , UniGene build 163
GI_22035613-I	3.33e-05	OSBPL7	NM_017731.3	Homo sapiens oxysterol binding protein-like 7 (OSBPL7), transcript variant 2, mRNA.
GI_13430867-S	3.19e-05	MGC2615	NM_024103.1	Homo sapiens hypothetical protein MGC2615 (MGC2615), mRNA.
GI_30410024-S	3.19e-05	FLJ31204	NM_174912.2	Homo sapiens hypothetical protein FLJ31204 (FLJ31204), mRNA.
GI_41327786-I	3.19e-05	DKFZP564J0123	NM_199074.1	Homo sapiens nuclear protein E3-3 (DKFZP564J0123), transcript variant 4, mRNA.
GI_29744071-S	3.18e-05	LOC338817	XM_290588.1	Homo sapiens similar to dJ1049G16.2.2 (continued from bA456N23.2 in Em:AL353777 and dJ237J2.1 in Em:AL021394) (LOC338817), mRNA.
GI_5803097-S	3.08e-05	MYST3	NM_006766.1	Homo sapiens MYST histone acetyltransferase (monocytic leukemia) 3 (MYST3), mRNA.
GI_37546515-S	3.06e-05	THOC2	XM_047325.6	Homo sapiens THO complex 2 (THOC2), mRNA.
GI_39573729-S	3.04e-05	MGC52000	NM_198943.1	Homo sapiens CXYorf1-related protein (MGC52000), mRNA.
GI_4758865-S	3.02e-05	C5orf13	NM_004772.1	Homo sapiens chromosome 5 open reading frame 13 (C5orf13), mRNA.
hmm22305-S	2.97e-05	hmm22305	null	Gnomon gene hmm22305 , RefSeq build 34
Hs.387796-S	2.92e-05	Hs.387796	null	Cluster 387796 , UniGene build 163
GI_34147684-S	2.87e-05	HES6	NM_018645.3	Homo sapiens hairy and enhancer of split 6 (Drosophila) (HES6), mRNA.
GI_38016902-S	2.77e-05	XTP2	NM_015172.2	Homo sapiens HBxAg transactivated protein 2 (XTP2), mRNA.
Hs.356835-S	2.74e-05	Hs.356835	null	Cluster 356835 , UniGene build 163
GI_7669491-S	2.68e-05	GAPD	NM_002046.2	Homo sapiens glyceraldehyde-3-phosphate dehydrogenase (GAPD), mRNA.
GI_24308174-S	2.48e-05	FLJ20719	NM_017940.1	Homo sapiens hypothetical protein FLJ20719 (FLJ20719), mRNA.
GI_30160107-S	2.46e-05	LOC147136	XM_300674.1	Homo sapiens hypothetical protein LOC147136 (LOC147136), mRNA.
GI_17978488-A	2.44e-05	CD97	NM_001784.2	Homo sapiens CD97 antigen (CD97), transcript variant 2, mRNA.
GI_25470885-A	2.36e-05	DAZAP1	NM_018959.2	Homo sapiens DAZ associated protein 1 (DAZAP1), transcript variant 2, mRNA.
GI_16507197-S	2.35e-05	ZNF291	NM_020843.1	Homo sapiens zinc finger protein 291 (ZNF291), mRNA.
GI_12056477-S	2.29e-05	UCN	NM_003353.2	Homo sapiens urocortin (UCN), mRNA.
GI_5174616-S	2.27e-05	CARD4	NM_006092.1	Homo sapiens caspase recruitment domain family, member 4 (CARD4), mRNA.
GI_19743895-A	2.22e-05	TADA3L	NM_133481.1	Homo sapiens transcriptional adaptor 3 (NGG1 homolog, yeast)-like (TADA3L), transcript variant 3, mRNA.
GI_34222119-S	2.2e-05	ZBTB4	NM_020899.2	Homo sapiens zinc finger and BTB domain containing 4 (ZBTB4), mRNA.
Hs.433547-S	2.2e-05	Hs.433547	null	Cluster 433547 , UniGene build 163
GI_18594428-S	2.15e-05	KIAA0767	XM_027105.3	Homo sapiens KIAA0767 protein (KIAA0767), mRNA.
GI_18860869-A	2.05e-05	MADD	NM_130474.1	Homo sapiens MAP-kinase activating death domain (MADD), transcript variant 6, mRNA.
GI_11141890-S	2.05e-05	LMAN1L	NM_021819.1	Homo sapiens lectin, mannose-binding, 1 like (LMAN1L), mRNA.
GI_37550189-S	2.04e-05	2007-09-08	XM_034872.7	Homo sapiens likely ortholog of mouse septin 8 (SEPT8), mRNA.
GI_41352062-S	1.92e-05	PFKP	NM_002627.3	Homo sapiens phosphofructokinase, platelet (PFKP), mRNA.
GI_34222113-S	1.91e-05	KIAA1434	NM_019593.2	Homo sapiens hypothetical protein KIAA1434 (KIAA1434), mRNA.
GI_41147867-S	1.87e-05	LOC392888	XM_374605.1	Homo sapiens similar to T-cell receptor gamma chain V region PT-gamma-1/2 precursor (LOC392888), mRNA.
GI_37674209-S	1.87e-05	SSH2	NM_033389.2	Homo sapiens slingshot 2 (SSH2), mRNA.
GI_38372900-S	1.68e-05	SP1	NM_138473.2	Homo sapiens Sp1 transcription factor (SP1), mRNA.
GI_23510378-I	1.63e-05	TNPO1	NM_002270.2	Homo sapiens transportin 1 (TNPO1), transcript variant 1, mRNA.
GI_38016157-S	1.63e-05	LOC91431	NM_138698.2	Homo sapiens prematurely terminated mRNA decay factor-like (LOC91431), mRNA.
Hs.464643-S	1.53e-05	Hs.464643	null	Cluster 464643 , UniGene build 163
GI_8923535-S	1.52e-05	HCFC1R1	NM_017885.1	Homo sapiens host cell factor C1 regulator 1 (XPO1 dependant) (HCFC1R1), mRNA.
GI_24431963-S	1.5e-05	HBS1L	NM_006620.2	Homo sapiens HBS1-like (S. cerevisiae) (HBS1L), mRNA.
GI_7019572-S	1.4e-05	STRN4	NM_013403.1	Homo sapiens striatin, calmodulin binding protein 4 (STRN4), mRNA.
GI_4505036-S	1.33e-05	LTBP4	NM_003573.1	Homo sapiens latent transforming growth factor beta binding protein 4 (LTBP4), mRNA.
GI_22203764-S	1.32e-05	GALNT12	NM_024642.2	Homo sapiens UDP-N-acetyl-alpha-D-galactosamine:polypeptide N-acetylgalactosaminyltransferase 12 (GalNAc-T12) (GALNT12), mRNA.
Hs.224849-S	1.31e-05	Hs.224849	null	Cluster 224849 , UniGene build 163
GI_34147218-S	1.31e-05	C14orf112	NM_016468.3	Homo sapiens chromosome 14 open reading frame 112 (C14orf112), mRNA.
GI_40354211-S	1.3e-05	PIP3-E	NM_015553.1	Homo sapiens phosphoinositide-binding protein PIP3-E (PIP3-E), mRNA.
GI_41146856-S	1.3e-05	LOC389201	XM_374077.1	Homo sapiens LOC389201 (LOC389201), mRNA.
GI_5454161-S	1.29e-05	TXNIP	NM_006472.1	Homo sapiens thioredoxin interacting protein (TXNIP), mRNA.
GI_18379348-S	1.23e-05	VAT1	NM_006373.2	Homo sapiens vesicle amine transport protein 1 homolog (T californica) (VAT1), mRNA.
GI_42659238-S	1.21e-05	LOC401547	XM_376900.1	Homo sapiens similar to KIAA0563 gene product (LOC401547), mRNA.
GI_27436919-I	1.13e-05	SPAG9	NM_003971.3	Homo sapiens sperm associated antigen 9 (SPAG9), transcript variant 1, mRNA.
GI_37551144-S	1.04e-05	LOC285741	XM_209741.2	Homo sapiens similar to Translationally controlled tumor protein (TCTP) (p23) (Histamine-releasing factor) (HRF) (LOC285741), mRNA.
GI_29570790-I	1e-05	CSNK2A1	NM_177559.1	Homo sapiens casein kinase 2, alpha 1 polypeptide (CSNK2A1), transcript variant 1, mRNA.
GI_38201711-A	9.88e-06	DDX17	NM_030881.2	Homo sapiens DEAD (Asp-Glu-Ala-Asp) box polypeptide 17 (DDX17), transcript variant 2, mRNA.
GI_19923908-S	9.84e-06	LOC92305	NM_138385.1	Homo sapiens hypothetical protein BC009331 (LOC92305), mRNA.
GI_24308397-S	9.84e-06	LOC89894	NM_138341.1	Homo sapiens hypothetical protein BC000282 (LOC89894), mRNA.
GI_16507966-S	9.83e-06	ENO2	NM_001975.2	Homo sapiens enolase 2 (gamma, neuronal) (ENO2), mRNA.
GI_7705707-S	9.06e-06	LOC51066	NM_015931.1	Homo sapiens fls485 (LOC51066), mRNA.
GI_34222212-S	9.05e-06	EVER1	NM_007267.5	Homo sapiens epidermodysplasia verruciformis 1 (EVER1), mRNA.
GI_11321635-S	8.84e-06	TPSD1	NM_012217.1	Homo sapiens tryptase delta 1 (TPSD1), mRNA.
GI_41197088-S	8.37e-06	HLA-DQA1	XM_371812.1	Homo sapiens major histocompatibility complex, class II, DQ alpha 1 (HLA-DQA1), mRNA.
GI_22749406-S	8.35e-06	MGC9850	NM_152705.1	Homo sapiens hypothetical protein MGC9850 (MGC9850), mRNA.
GI_30151609-S	8.09e-06	DKFZP727G051	XM_045308.6	Homo sapiens DKFZP727G051 protein (DKFZP727G051), mRNA.
GI_33667027-S	7.04e-06	IRF2BP2	NM_182972.1	Homo sapiens interferon regulatory factor 2 binding protein 2 (IRF2BP2), mRNA.
GI_40255048-S	6.46e-06	C9orf55	NM_017925.3	Homo sapiens chromosome 9 open reading frame 55 (C9orf55), mRNA.
GI_24308072-S	6.29e-06	PTPN23	NM_015466.1	Homo sapiens protein tyrosine phosphatase, non-receptor type 23 (PTPN23), mRNA.
hmm34630-S	6.14e-06	hmm34630	null	Gnomon gene hmm34630 , RefSeq build 34
GI_34147486-A	5.66e-06	C21orf80	NM_133635.2	Homo sapiens chromosome 21 open reading frame 80 (C21orf80), mRNA.
GI_4826697-S	5.4e-06	DNASE1L3	NM_004944.1	Homo sapiens deoxyribonuclease I-like 3 (DNASE1L3), mRNA.
GI_34335263-A	5.19e-06	PRKCBP1	NM_183048.1	Homo sapiens protein kinase C binding protein 1 (PRKCBP1), transcript variant 3, mRNA.
GI_34147336-S	5.02e-06	ZNF337	NM_015655.2	Homo sapiens zinc finger protein 337 (ZNF337), mRNA.
GI_21361550-S	4.79e-06	SLC4A2	NM_003040.2	Homo sapiens solute carrier family 4, anion exchanger, member 2 (erythrocyte membrane protein band 3-like 1) (SLC4A2), mRNA.
GI_5453933-S	4.52e-06	POU2AF1	NM_006235.1	Homo sapiens POU domain, class 2, associating factor 1 (POU2AF1), mRNA.
hmm25682-S	4.48e-06	hmm25682	null	Gnomon gene hmm25682 , RefSeq build 34
GI_18491007-S	4.39e-06	CYP2J2	NM_000775.2	Homo sapiens cytochrome P450, family 2, subfamily J, polypeptide 2 (CYP2J2), mRNA.
GI_16117780-I	4.38e-06	FBXW7	NM_033632.1	Homo sapiens F-box and WD-40 domain protein 7 (archipelago homolog, Drosophila) (FBXW7), transcript variant 1, mRNA.
GI_14249613-S	4.2e-06	JFC1	NM_032872.1	Homo sapiens NADPH oxidase-related, C2 domain-containing protein (JFC1), mRNA.
GI_42655896-S	4.13e-06	LOC85028	XM_378848.1	Homo sapiens PNAS-123 (LOC85028), mRNA.
GI_7657183-S	3.91e-06	ZNF318	NM_014345.1	Homo sapiens zinc finger protein 318 (ZNF318), mRNA.
GI_37540654-S	3.87e-06	KIAA1729	XM_114418.3	Homo sapiens KIAA1729 protein (KIAA1729), mRNA.
GI_34594658-S	3.84e-06	FLJ39616	NM_016534.2	Homo sapiens apoptosis-related protein PNAS-1 (FLJ39616), mRNA.
GI_21237807-A	3.82e-06	SMARCC2	NM_139067.1	Homo sapiens SWI/SNF related, matrix associated, actin dependent regulator of chromatin, subfamily c, member 2 (SMARCC2), transcript variant 2, mRNA.
GI_25286702-S	3.77e-06	MGC33867	NM_138346.1	Homo sapiens hypothetical protein MGC33867 (MGC33867), mRNA.
GI_4504698-S	3.51e-06	INHBA	NM_002192.1	Homo sapiens inhibin, beta A (activin A, activin AB alpha polypeptide) (INHBA), mRNA.
GI_5454093-S	3.51e-06	STK3	NM_006281.1	Homo sapiens serine/threonine kinase 3 (STE20 homolog, yeast) (STK3), mRNA.
GI_32307169-I	3.34e-06	DGKH	NM_178009.2	Homo sapiens diacylglycerol kinase, eta (DGKH), transcript variant 2, mRNA.
GI_35249735-I	3.01e-06	ZNF226	NM_015919.2	Homo sapiens zinc finger protein 226 (ZNF226), mRNA.
GI_21264595-A	2.81e-06	CENTD2	NM_015242.2	Homo sapiens centaurin, delta 2 (CENTD2), transcript variant 2, mRNA.
GI_33457354-S	2.76e-06	C6orf151	NM_152551.2	Homo sapiens chromosome 6 open reading frame 151 (C6orf151), mRNA.
GI_33188458-S	2.66e-06	BRAF	NM_004333.2	Homo sapiens v-raf murine sarcoma viral oncogene homolog B1 (BRAF), mRNA.
GI_39753960-S	2.66e-06	IQGAP3	NM_178229.3	Homo sapiens IQ motif containing GTPase activating protein 3 (IQGAP3), mRNA.
Hs.481630-S	2.53e-06	Hs.481630	null	Cluster 481630 , UniGene build 163
GI_29728998-S	2.48e-06	LOC343170	XM_291436.1	Homo sapiens similar to seven transmembrane helix receptor (LOC343170), mRNA.
GI_34222277-S	2.17e-06	FLJ32130	NM_152458.4	Homo sapiens hypothetical protein FLJ32130 (FLJ32130), mRNA.
GI_31563520-S	2.16e-06	MGC10715	NM_024325.4	Homo sapiens novel C2H2 type zinc finger protein (MGC10715), mRNA.
GI_17318558-I	1.98e-06	CCNE1	NM_001238.1	Homo sapiens cyclin E1 (CCNE1), transcript variant 1, mRNA.
GI_6631092-S	1.94e-06	MAN2C1	NM_006715.1	Homo sapiens mannosidase, alpha, class 2C, member 1 (MAN2C1), mRNA.
GI_22748838-S	1.93e-06	AHSA2	NM_152392.1	Homo sapiens AHA1, activator of heat shock 90kDa protein ATPase homolog 2 (yeast) (AHSA2), mRNA.
GI_29789292-S	1.78e-06	LIP8	NM_053051.1	Homo sapiens LYST-interacting protein LIP8 (LIP8), mRNA.
GI_37538197-S	1.65e-06	KIAA1228	XM_036408.5	Homo sapiens KIAA1228 protein (KIAA1228), mRNA.
GI_38044279-S	1.47e-06	SEDL	NM_014563.2	Homo sapiens spondyloepiphyseal dysplasia, late (SEDL), mRNA.
GI_4557514-S	1.25e-06	DDB2	NM_000107.1	Homo sapiens damage-specific DNA binding protein 2, 48kDa (DDB2), mRNA.
GI_10518498-S	1.17e-06	RNF24	NM_007219.2	Homo sapiens ring finger protein 24 (RNF24), mRNA.
GI_22062495-S	1.12e-06	DKFZp762C186	XM_170658.1	Homo sapiens tangerin (DKFZp762C186), mRNA.
GI_24432005-S	1.08e-06	FLJ22341	NM_024599.2	Homo sapiens hypothetical protein FLJ22341 (FLJ22341), mRNA.
GI_42661972-S	8.77e-07	DKFZp434I1610	XM_375569.1	Homo sapiens hypothetical protein DKFZp434I1610 (DKFZp434I1610), mRNA.
GI_21328445-S	8.73e-07	LIPE	NM_005357.2	Homo sapiens lipase, hormone-sensitive (LIPE), mRNA.
GI_42476129-S	8.21e-07	RAP80	NM_016290.3	Homo sapiens receptor associated protein 80 (RAP80), mRNA.
GI_7019586-S	7.93e-07	ZNF222	NM_013360.1	Homo sapiens zinc finger protein 222 (ZNF222), mRNA.
GI_7706149-A	7.5e-07	MSCP	NM_016612.1	Homo sapiens mitochondrial solute carrier protein (MSCP), mRNA.
GI_19924146-A	5.58e-07	TCIRG1	NM_006053.2	Homo sapiens T-cell, immune regulator 1, ATPase, H+ transporting, lysosomal V0 protein a isoform 3 (TCIRG1), transcript variant 2, mRNA.
GI_4503600-S	5.29e-07	ERCC5	NM_000123.1	Homo sapiens excision repair cross-complementing rodent repair deficiency, complementation group 5 (xeroderma pigmentosum, complementation group G (Cockayne syndrome)) (ERCC5), mRNA.
GI_18375620-A	5.1e-07	DATF1	NM_080797.1	Homo sapiens death associated transcription factor 1 (DATF1), transcript variant 3, mRNA.
GI_20986494-I	5.07e-07	YAP	NM_139121.1	Homo sapiens YY1 associated protein (YAP), transcript variant 5, mRNA.
GI_7656889-A	4.15e-07	REPIN1	NM_014374.1	Homo sapiens replication initiator 1 (REPIN1), mRNA.
GI_31543440-S	4.1e-07	PRO0659	NM_014138.2	Homo sapiens PRO0659 protein (PRO0659), mRNA.
Hs.291926-S	4.04e-07	Hs.291926	null	Cluster 291926 , UniGene build 163
GI_27734954-S	3.94e-07	DKFZp434C1418	NM_173655.1	Homo sapiens hypothetical protein DKFZp434C1418 (DKFZp434C1418), mRNA.
GI_42660794-S	3.59e-07	LOC388284	XM_370984.2	Homo sapiens LOC388284 (LOC388284), mRNA.
GI_21362059-S	3.39e-07	MGC13114	NM_032366.2	Homo sapiens hypothetical protein MGC13114 (MGC13114), mRNA.
GI_8923525-S	3.25e-07	HRASLS2	NM_017878.1	Homo sapiens HRAS-like suppressor 2 (HRASLS2), mRNA.
GI_40548380-S	3.12e-07	NAGLU	NM_000263.2	Homo sapiens N-acetylglucosaminidase, alpha- (Sanfilippo disease IIIB) (NAGLU), mRNA.
GI_7705315-S	2.93e-07	GPR2	NM_016602.1	Homo sapiens G protein-coupled receptor 2 (GPR2), mRNA.
GI_34147470-S	2.71e-07	MGC10485	NM_052875.2	Homo sapiens hypothetical protein MGC10485 (MGC10485), mRNA.
GI_7661925-S	2.49e-07	TRIP-Br2	NM_014755.1	Homo sapiens transcriptional regulator interacting with the PHS-bromodomain 2 (TRIP-Br2), mRNA.
GI_34222105-S	2.27e-07	SAMD4	NM_015589.2	Homo sapiens sterile alpha motif domain containing 4 (SAMD4), mRNA.
GI_19923465-S	2.16e-07	SRRM2	NM_016333.2	Homo sapiens serine/arginine repetitive matrix 2 (SRRM2), mRNA.
GI_27881480-S	1.86e-07	RAC2	NM_002872.3	Homo sapiens ras-related C3 botulinum toxin substrate 2 (rho family, small GTP binding protein Rac2) (RAC2), mRNA.
GI_37543967-S	1.83e-07	LOC376084	XM_352067.1	Homo sapiens similar to eukaryotic translation initiation factor 3, subunit 5 (epsilon) (LOC376084), mRNA.
GI_20336278-A	8.77e-08	SLC26A6	NM_134426.1	Homo sapiens solute carrier family 26, member 6 (SLC26A6), transcript variant 3, mRNA.
GI_37574605-A	8.28e-08	ZNF198	NM_197968.1	Homo sapiens zinc finger protein 198 (ZNF198), mRNA.
GI_31982870-S	7.32e-08	LOC128439	NM_139016.2	Homo sapiens hypothetical gene LOC128439 (LOC128439), mRNA.
Hs.171092-S	4.47e-08	Hs.171092	null	Cluster 171092 , UniGene build 163
GI_21396488-S	4.42e-08	PRSS15	NM_004793.2	Homo sapiens protease, serine, 15 (PRSS15), nuclear gene encoding mitochondrial protein, mRNA.
GI_28872785-S	4.19e-08	CDK5RAP2	NM_018249.3	Homo sapiens CDK5 regulatory subunit associated protein 2 (CDK5RAP2), mRNA.
GI_42661618-S	3.83e-08	LOC400695	XM_378801.1	Homo sapiens LOC400695 (LOC400695), mRNA.
GI_38327538-S	2.42e-08	INPP5E	NM_019892.2	Homo sapiens inositol polyphosphate-5-phosphatase, 72 kDa (INPP5E), mRNA.
GI_7662393-S	1.95e-08	Rab11-FIP2	NM_014904.1	Homo sapiens KIAA0941 protein (Rab11-FIP2), mRNA.
GI_14149792-S	1.66e-08	DKFZP434P0316	NM_032134.1	Homo sapiens hypothetical protein DKFZp434P0316 (DKFZP434P0316), mRNA.
GI_41393613-I	7.73e-09	RAB5C	NM_201434.1	Homo sapiens RAB5C, member RAS oncogene family (RAB5C), transcript variant 1, mRNA.
GI_18641365-A	7.01e-09	PTPRC	NM_080923.1	Homo sapiens protein tyrosine phosphatase, receptor type, C (PTPRC), transcript variant 4, mRNA.
GI_26638665-A	5.54e-09	MSH5	NM_172166.1	Homo sapiens mutS homolog 5 (E. coli) (MSH5), transcript variant 4, mRNA.
GI_14670372-A	3.47e-09	PCBP4	NM_033010.1	Homo sapiens poly(rC) binding protein 4 (PCBP4), transcript variant 4, mRNA.
GI_27484363-S	1.62e-09	LOC284134	XM_211345.1	Homo sapiens hypothetical LOC284134 (LOC284134), mRNA.
GI_10864046-S	5.11e-11	EPS15L1	NM_021235.1	Homo sapiens epidermal growth factor receptor pathway substrate 15-like 1 (EPS15L1), mRNA.
